# Supplementary material
Source: PubMed Central journal article supplement (PMC7876678)
Supplement: ao0c05189_si_001.pdf [file ao0c05189_si_001.pdf]

## Supporting Information

### **Active Bromoaniline–Aldehyde Conjugate Systems and Their Complexes as Versatile Sensors of Multiple Cations with Logic Formulation and Efficient DNA/HSA Binding Efficacy: Combined Experimental and Theoretical Approach**

Manik Das,<sup>a</sup> Somali Mukherjee,<sup>b,\*</sup> Paula Brandao,<sup>c</sup> Saikat Kumar seth,<sup>d</sup> Santanab Giri,<sup>e</sup> Soumya Sundar Mati,<sup>f</sup> Bidhan Chandra Samanta,<sup>g</sup> Soumik Laha,<sup>h</sup> Tithi Maity<sup>a,\*</sup>

<sup>a</sup> Department of Chemistry, P. K. College, Contai, Purba Medinipur, West Bengal 721404, India.

<sup>b</sup> Department of Chemistry, University of Calcutta, 92, A. P. C. Road, Kolkata 700009, India.

<sup>c</sup> Departamento de Química/CICEC, Universidade de Aveiro

<sup>d</sup> Department of Physics, Jadavpur University, Kolkata, India.

<sup>e</sup> Department of Chemistry, HIT, Haldia, India

<sup>f</sup> Department of Chemistry, Government General Degree College, Keshiary, India

<sup>g</sup> Department of Chemistry, Mugberia Gangadhar Mahavidyalaya, Purba Medinipur, West Bengal India

<sup>h</sup> IICB, Kolkata

E-mail: [titlipkc2008@gmail.com](mailto:titlipkc2008@gmail.com) & [somalimukherjee1993@gmail.com](mailto:somalimukherjee1993@gmail.com)

| Sl. No. | Index                                                                                                                                                                                                                                                               | Page No.  |
|---------|---------------------------------------------------------------------------------------------------------------------------------------------------------------------------------------------------------------------------------------------------------------------|-----------|
| 1.      | IR spectrum of complex <b>1</b> and <b>2</b> ( <b>Figure S1</b> )                                                                                                                                                                                                   | <b>S3</b> |
| 2.      | UV spectrum of complex <b>1</b> and <b>2</b> ( <b>Figure S2</b> )                                                                                                                                                                                                   | <b>S3</b> |
| 3.      | Selected bond lengths and angles table of complex <b>1</b> and <b>2</b> ( <b>Table S1</b> )                                                                                                                                                                         | <b>S4</b> |
| 4.      | Change of fluorescence intensity after addition of different analysts (60 $\mu\text{M}$ ) to a fixed concentration of ligand <b>HL</b> <sub>1</sub> and <b>HL</b> <sub>2</sub> (40 $\mu\text{M}$ ) DMSO/H <sub>2</sub> O HEPES buffer solution ( <b>Figure S3</b> ) | <b>S4</b> |
| 5.      | Stern-Volmer graph for detection of quenching constant of <b>HL</b> <sub>1</sub> after addition of Cu <sup>2+</sup> ion ( <b>Figure S4</b> )                                                                                                                        | <b>S5</b> |

|     |                                                                                                                                                                                                                                                                                                 |            |
|-----|-------------------------------------------------------------------------------------------------------------------------------------------------------------------------------------------------------------------------------------------------------------------------------------------------|------------|
| 6.  | Change of Fluorescence emission intensity of (a) <b>HL<sub>1</sub></b> as a function of Cu <sup>2+</sup> ion and (b) <b>HL<sub>2</sub></b> as a function of Zn <sup>2+</sup> ion for detection limit calculation ( <b>Figure S5</b> )                                                           | <b>S5</b>  |
| 7.  | UV spectral titration of (a) <b>HL<sub>1</sub></b> with Cu <sup>2+</sup> and (b) <b>HL<sub>2</sub></b> with Zn <sup>2+</sup> ion solution respectively ( <b>Figure S6</b> )                                                                                                                     | <b>S6</b>  |
| 8.  | Stability in DMSO/H <sub>2</sub> O 9:1 HEPES buffer medium at different pH and the stability in DMSO/water (9:1) solvent at a fixed pH value (7.4) by means of time–scan experiment of (a) <b>HL<sub>1</sub></b> and (b) <b>HL<sub>2</sub></b> ( <b>Figure S7</b> )                             | <b>S6</b>  |
| 9.  | Naked eye colour changes after addition of Al <sup>3+</sup> and Hg <sup>2+</sup> to complex <b>2</b> in the presence of different cations in 9:1 (DMSO/H <sub>2</sub> O) HEPES buffer (pH = 7.4) solution ( <b>Figure S8</b> )                                                                  | <b>S7</b>  |
| 10. | Stern-Volmer graph for detection of quenching constant of complex <b>2</b> after addition of (a) Al <sup>3+</sup> ion and (b) Hg <sup>2+</sup> ion ( <b>Figure S9</b> )                                                                                                                         | <b>S7</b>  |
| 11. | Change of Fluorescence emission intensity of complex <b>2</b> as a function of (a) Al <sup>3+</sup> ion and (b) Hg <sup>2+</sup> ion for detection limit calculation ( <b>Figure S10</b> )                                                                                                      | <b>S8</b>  |
| 12. | Absorption titration spectra of (a) complex <b>1</b> (b) complex <b>2</b> in absence and presence of ct-DNA. Inset: best fitting graph for binding affinity calculation ( <b>Figure 11</b> )                                                                                                    | <b>S8</b>  |
| 13. | Change of Emission spectra of the ctDNA-EtBr complex with addition of increasing concentration of (a) Complex <b>1</b> (b) Complex <b>2</b> and in inset the fractional fluorescence (F <sup>0</sup> /F) plot of CT-DNA-EtBr as a function concentration of the complexes ( <b>Figure S12</b> ) | <b>S9</b>  |
| 14. | Change of Emission spectra of the ctDNA-DAPI complex with addition of increasing concentration of (a) Complex <b>1</b> (b) Complex <b>2</b> and in inset the fractional fluorescence (F <sup>0</sup> /F) plot of CT-DNA-DAPI as a function concentration of the complexes ( <b>Figure S13</b> ) | <b>S9</b>  |
| 15. | CD spectra of ctDNA in CP buffer in the presence and absence of (a) complex <b>1</b> and (b) <b>2</b> ( <b>Figure 14</b> )                                                                                                                                                                      | <b>S10</b> |
| 16. | UV-Vis spectral analysis of complexes in tris buffer medium ( <b>Figure S15</b> )                                                                                                                                                                                                               | <b>S10</b> |
| 17. | Docked binding energy and other parameters of complex <b>1</b> and complex <b>2</b> with HSA and ctDNA ( <b>Table S2</b> )                                                                                                                                                                      | <b>S11</b> |

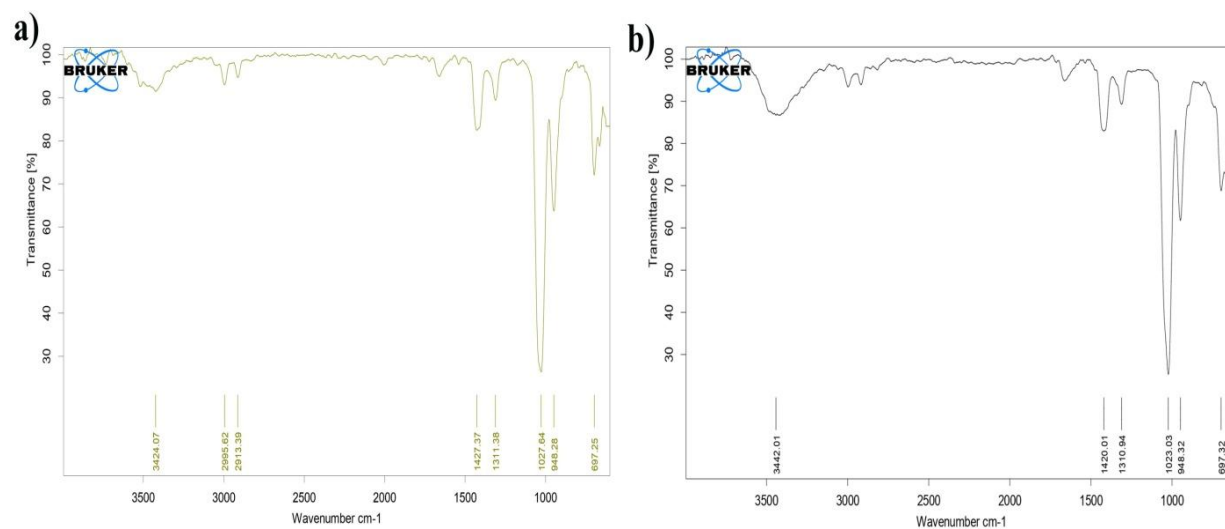

**Figure S1.** IR spectrum of complex (a) **1** and (b) **2**.

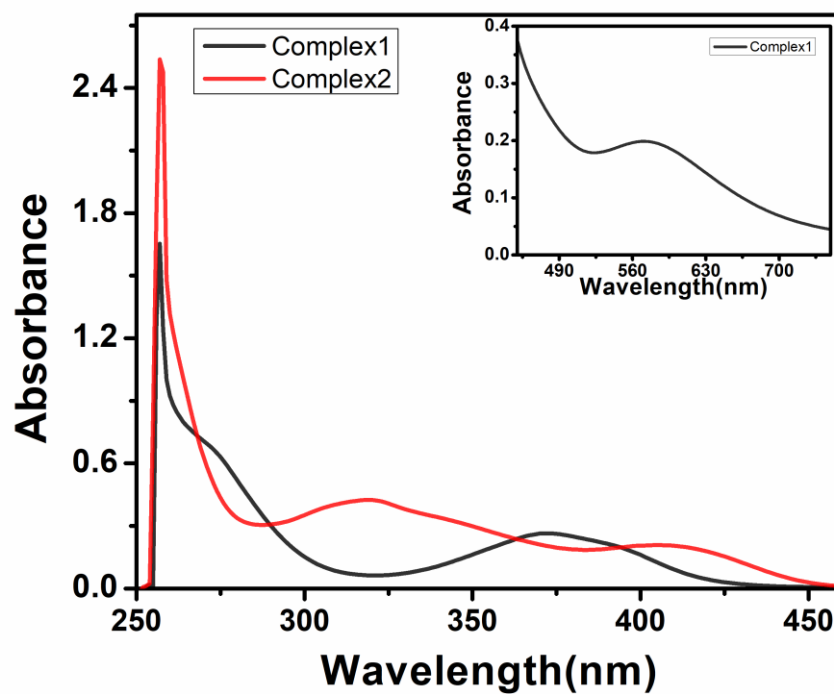

**Figure S2.** UV spectrum of complex **1** and **2**.

**Table S1.** Selected bond length and bond angle table of Complex **1** and **2**.

| Bond length (Å) |           |            |            |
|-----------------|-----------|------------|------------|
| Complex 1       |           | Complex 2  |            |
| Cu1-O1          | 1.888(4)  | Zn1-O1     | 1.899(3)   |
| Cu1-N1          | 2.011(3)  | Zn1-N1     | 2.022(3)   |
| Bond angle (°)  |           |            |            |
| Complex 1       |           | Complex 2  |            |
| O1-Cu1-N1       | 90.83(14) | O1-Zn1-N1  | 96.60(11)  |
| O1-Cu1-N1a      | 89.17(14) | N1-Zn1-N1a | 122.03(11) |
| N1-Cu1-N1a      | 180       | O1-Zn1-O1a | 119.60(12) |
| O1-Cu1-O1a      | 180.      | O1-Zn1-N1a | 111.87(11) |

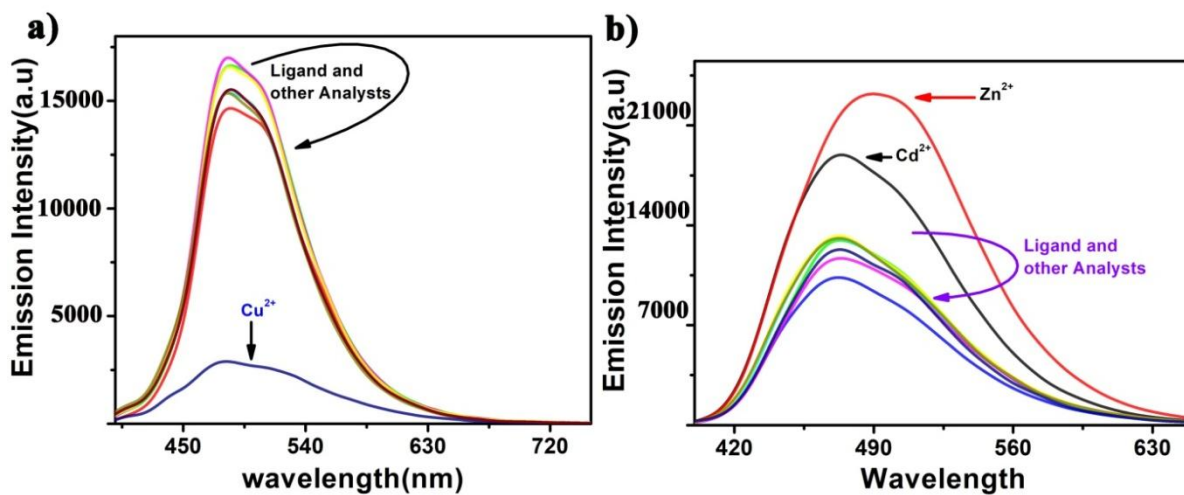

**Figure S3.** Change of fluorescence intensity after addition of different analytes (60 μM) to a fixed concentration of ligand (a) **HL<sub>1</sub>** and (b) **HL<sub>2</sub>** (40 μM) DMSO/H<sub>2</sub>O

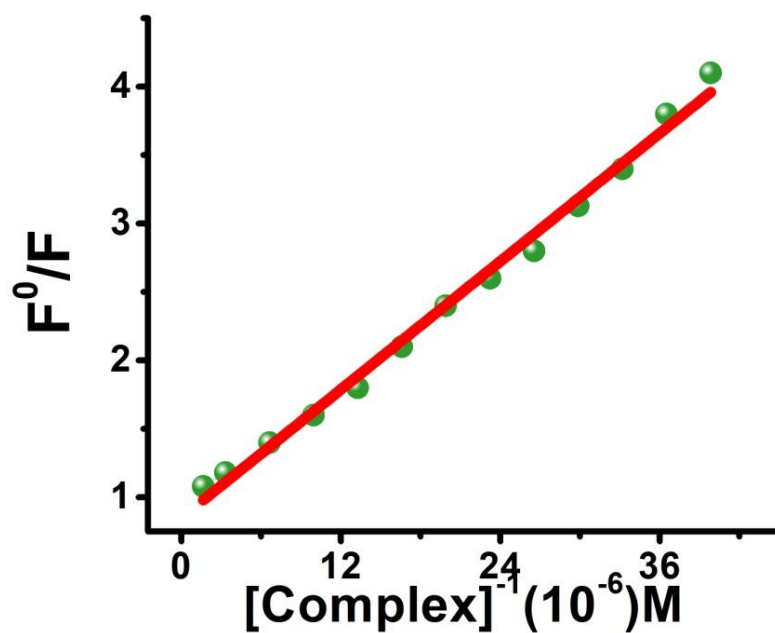

**Figure S4.** Stern-Volmer graph for determination of quenching constant of **HL<sub>1</sub>** after addition of  $\text{Cu}^{2+}$  ion.

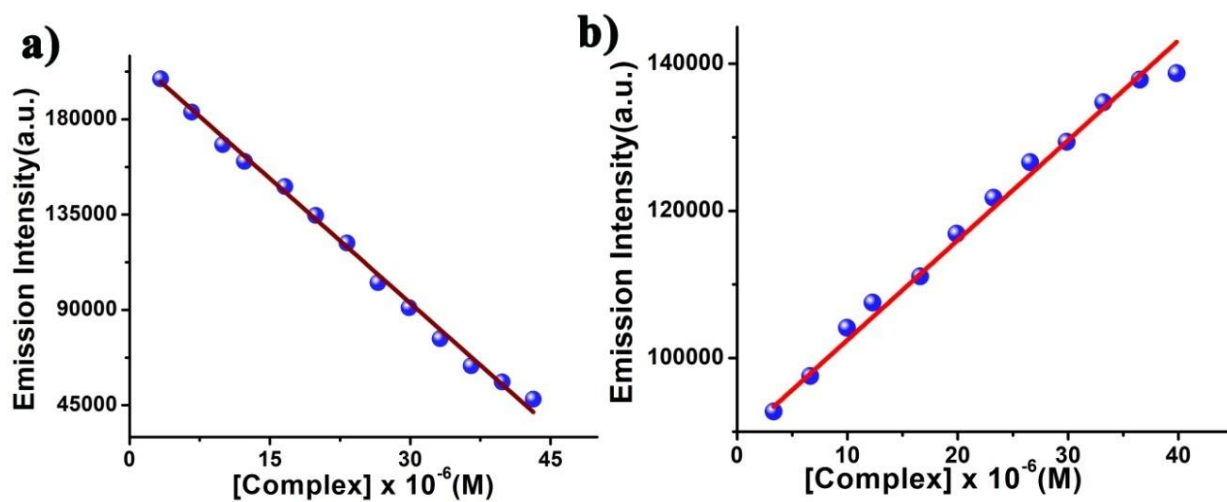

**Figure S5.** Change of Fluorescence emission intensity of (a) **HL<sub>1</sub>** as a function of  $\text{Cu}^{2+}$  ion and (b) **HL<sub>2</sub>** as a function of  $\text{Zn}^{2+}$  ion for detection limit calculation.

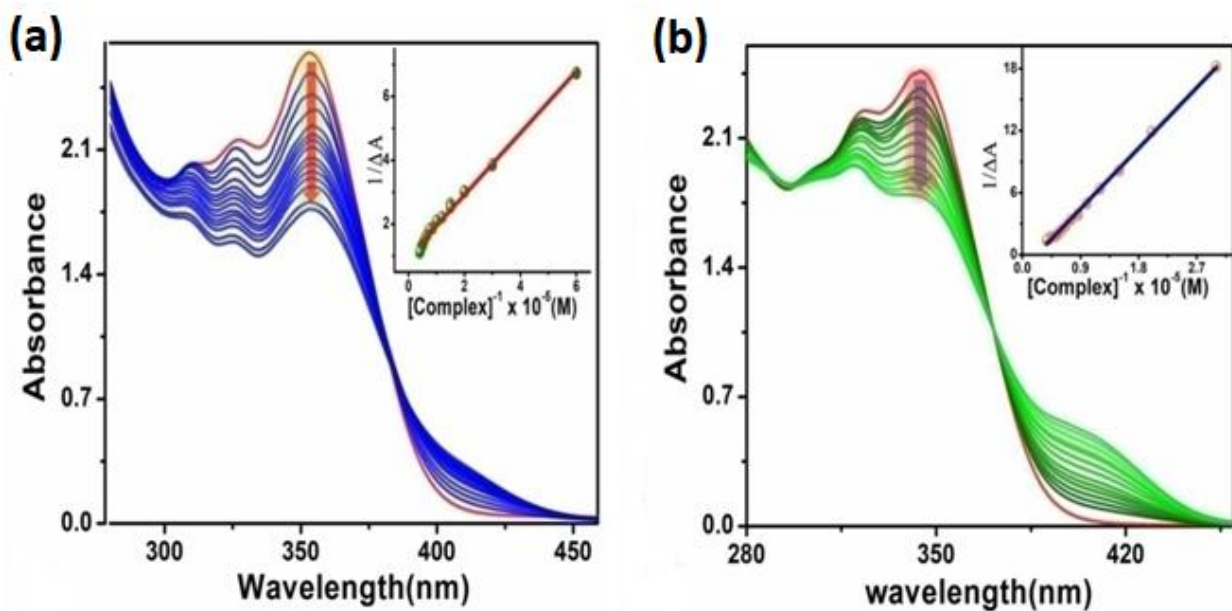

**Figure S6.** UV spectral titration of (a) **HL<sub>1</sub>** with Cu<sup>2+</sup> and (b) **HL<sub>2</sub>** with Zn<sup>2+</sup> ion solution respectively.

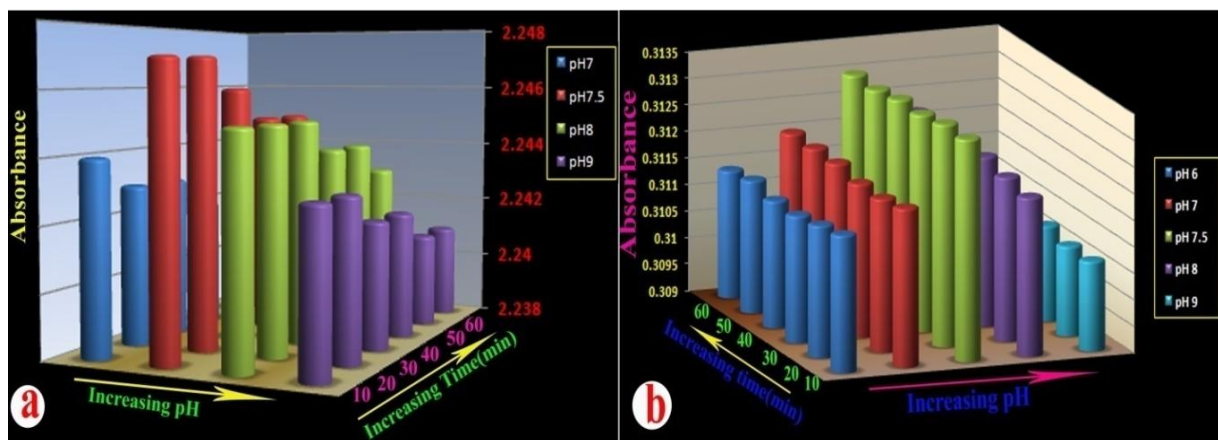

**Figure S7.** Stability in DMSO/H<sub>2</sub>O (9:1) HEPES buffer medium at different pH and the stability in DMSO/water (9:1) solvent at a fixed pH value (7.4) by means of time-scan experiment of (a) **HL<sub>1</sub>** and (b) **HL<sub>2</sub>**

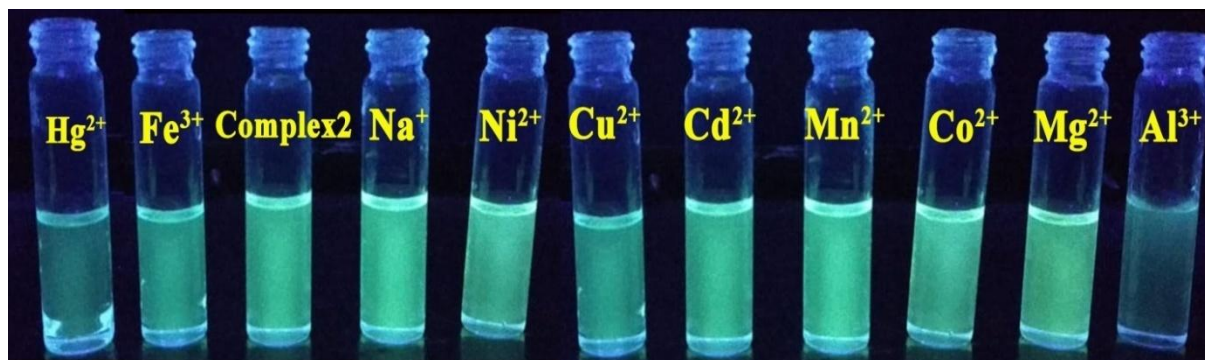

**Figure S8** Naked eye colour changes after addition of  $\text{Al}^{3+}$  and  $\text{Hg}^{2+}$  to complex **2** in the presence of different cations in 9:1 (DMSO/ $\text{H}_2\text{O}$ ) HEPES buffer (pH = 7.4) solution.

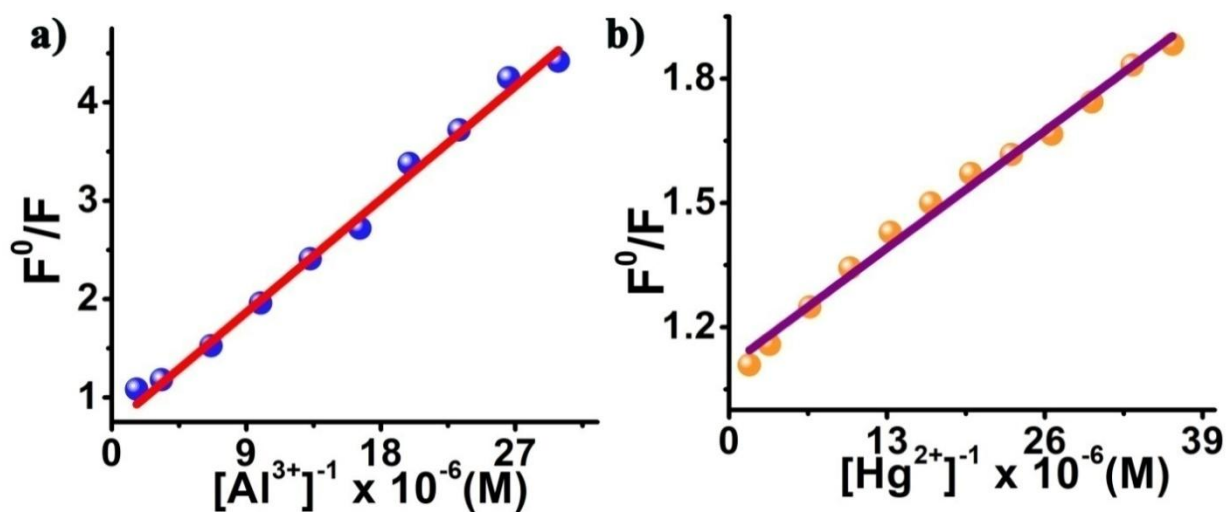

**Figure S9.** Stern-Volmer graph for detection of quenching constant of complex **2** after addition of (a)  $\text{Al}^{3+}$  ion and (b)  $\text{Hg}^{2+}$  ion.

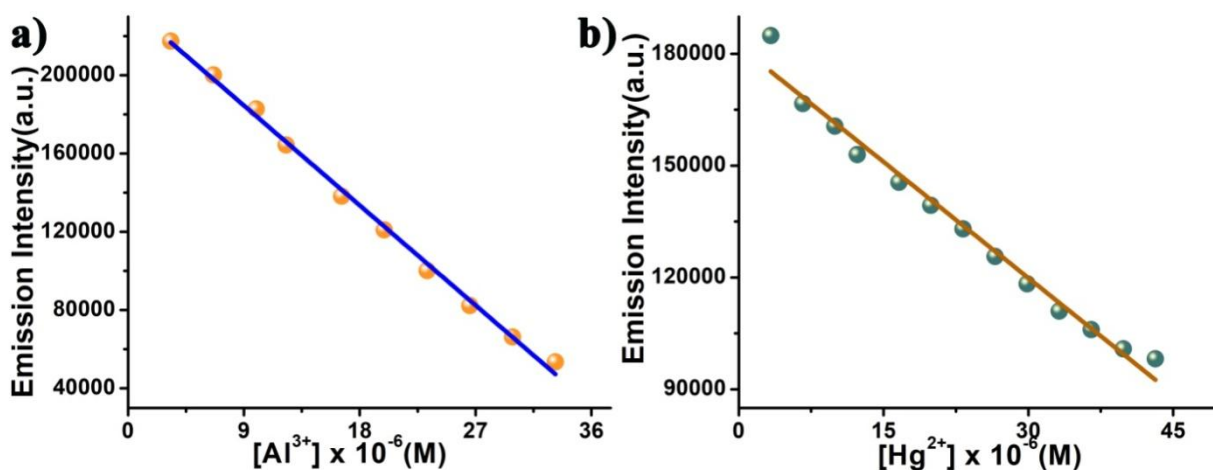

**Figure S10.** Change of fluorescence emission intensity of complex **2** as a function of (a)  $\text{Al}^{3+}$  ion and (b)  $\text{Hg}^{2+}$  ion for detection limit calculation.

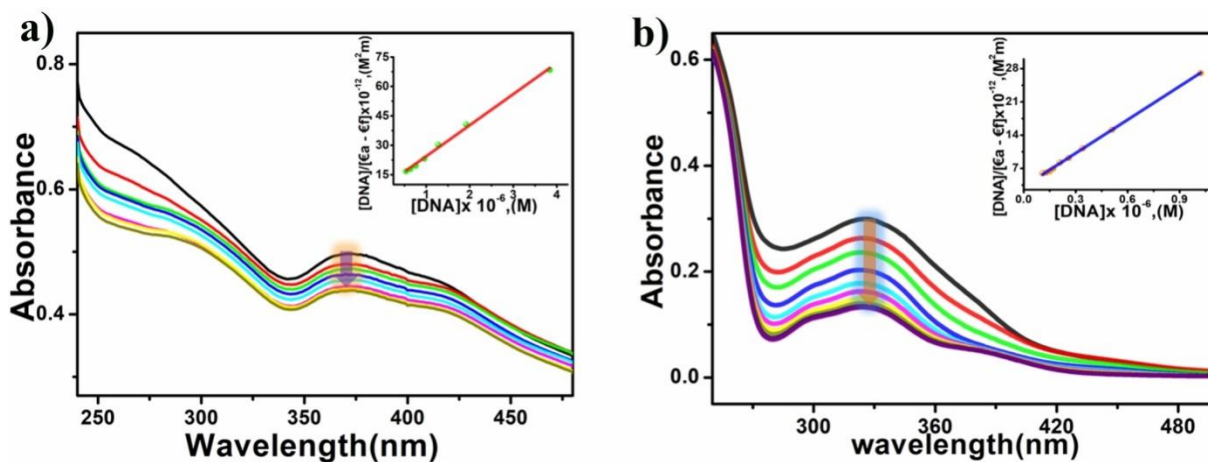

**Figure 11.** Absorption titration spectra of (a) complex **1** (b) complex **2** in absence and presence of ct-DNA. Inset: best fitting graph for binding affinity calculation.



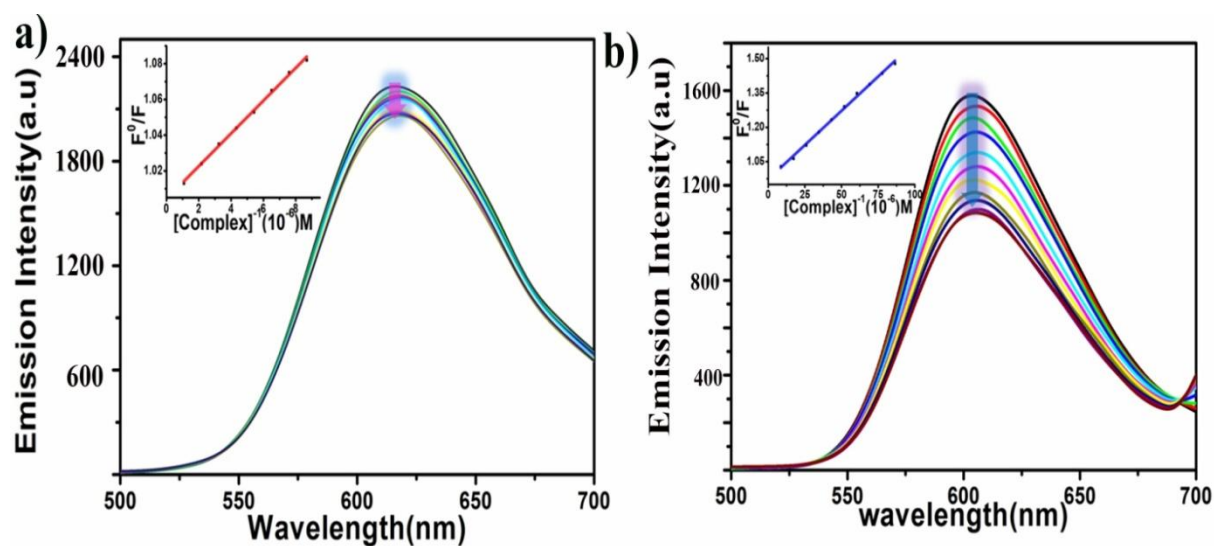

**Figure S12.** Change of Emission spectra of the ctDNA-EtBr complex with addition of increasing concentration of (a) Complex 1 (b) Complex 2 and in inset the fractional fluorescence ( $F^0/F$ ) plot of CT-DNA-EtBr as a function concentration of the complexes.

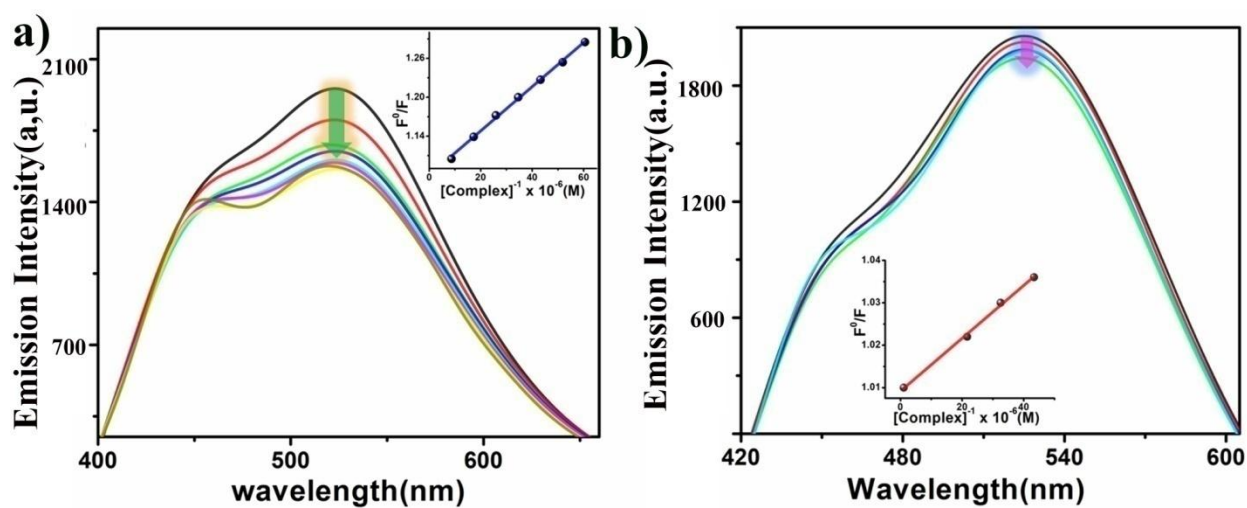

**Figure S13.** Change of Emission spectra of the ctDNA-DAPI complex with addition of increasing concentration of (a) Complex 1 (b) Complex 2 and in inset the fractional fluorescence ( $F^0/F$ ) plot of CT-DNA-DAPI as a function concentration of the complexes.

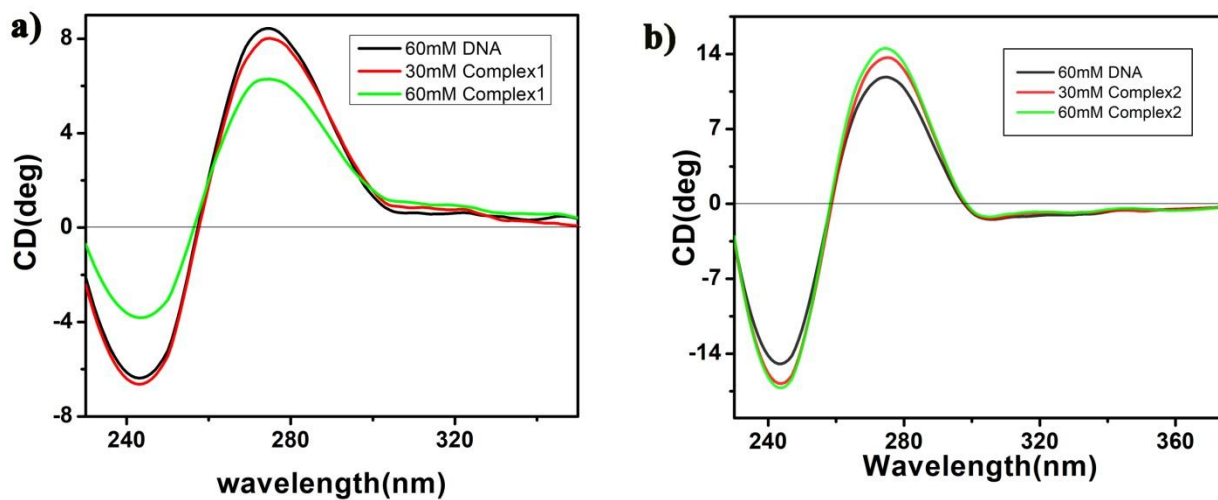

**Figure S14.** CD spectra of ctDNA in CP buffer in the presence and absence of (a) complex 1 and (b) 2

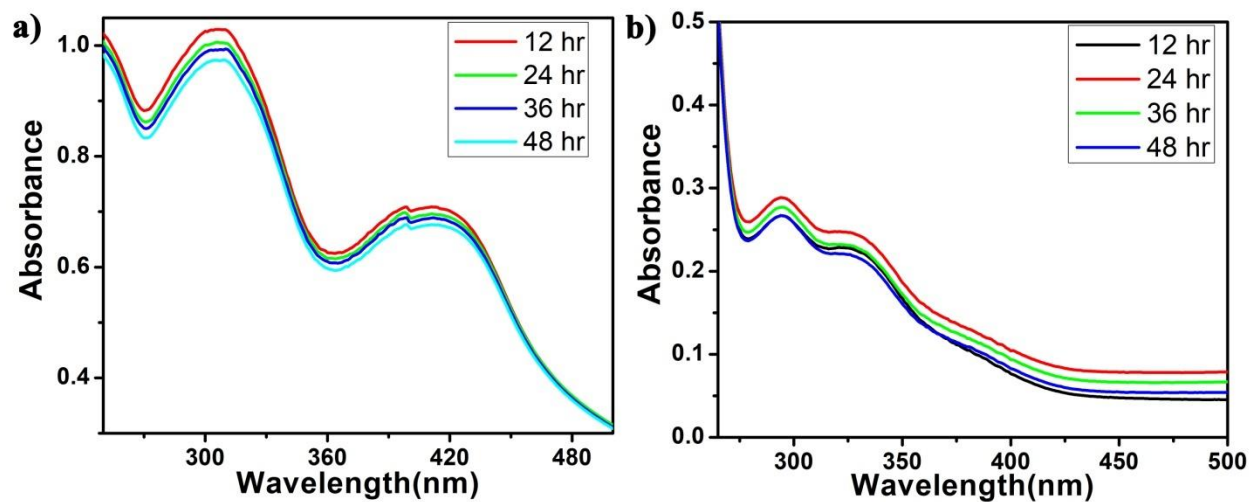

**Figure S15.** UV-Vis spectral analysis in tris buffer medium of (a) complex 1 and (b) 2.

**Table S2.** Docked binding energy and other parameters of complex **1** and complex **2** with HSA and ctDNA.

| <b>HSA</b>     |                                  |                          |                                         |
|----------------|----------------------------------|--------------------------|-----------------------------------------|
| <b>Complex</b> | <b>Binding energy (kcal/mol)</b> | <b>Ligand Efficiency</b> | <b>Intermolecular Energy (kcal/mol)</b> |
| <b>1</b>       | -8.96                            | -0.26                    | -9.55                                   |
| <b>2</b>       | -8.29                            | -0.25                    | -8.89                                   |
| <b>ctDNA</b>   |                                  |                          |                                         |
| <b>Complex</b> | <b>Binding energy (kcal/mol)</b> | <b>Ligand Efficiency</b> | <b>Intermolecular Energy (kcal/mol)</b> |
| <b>1</b>       | -5.61                            | -0.22                    | -6.20                                   |
| <b>2</b>       | -5.96                            | -0.26                    | -6.55                                   |

---
